# Supplementary material for: RNAseq Analyses Identify Tumor Necrosis Factor-Mediated Inflammation as a Major Abnormality in ALS Spinal Cord
Source: PubMed Central journal article supplement (PMC4972368; doi:10.1371/journal.pone.0160520), 2016-08-03
Supplement: pone.0160520.s001.pdf [file pone.0160520.s001.pdf]

## Supplementary Figure 1

| Sample ID | Bases Sequenced | PF Bases Aligned to hg19 genome | % Bases that PF and Aligned to hg19 genome | % PF Bases aligned to mRNA | % PF Bases aligned to rRNA/tRNA/mtRNA | % PF Bases aligned to intronic regions | % PF Bases aligned to intergenic regions |
|-----------|-----------------|---------------------------------|--------------------------------------------|----------------------------|---------------------------------------|----------------------------------------|------------------------------------------|
| ALS1      | 21,525,372,600  | 13,482,235,967                  | 62.6                                       | 30.3                       | 24.1                                  | 30.8                                   | 14.8                                     |
| ALS2      | 17,620,068,900  | 11,688,557,657                  | 66.3                                       | 25.4                       | 39.7                                  | 22.8                                   | 12.2                                     |
| ALS3      | 23,518,969,200  | 15,062,468,598                  | 64.0                                       | 35.8                       | 24.1                                  | 24.8                                   | 15.3                                     |
| ALS4      | 19,429,933,500  | 12,750,324,647                  | 65.6                                       | 37.1                       | 25.8                                  | 22.4                                   | 14.7                                     |
| ALS9      | 25,847,743,800  | 15,956,695,398                  | 61.7                                       | 36.7                       | 21.4                                  | 27.4                                   | 14.4                                     |
| ALS10     | 18,557,838,300  | 12,691,363,772                  | 68.4                                       | 31.8                       | 25.7                                  | 27.8                                   | 14.7                                     |
| ALS14     | 18,327,581,100  | 12,410,814,921                  | 67.7                                       | 43.7                       | 19.7                                  | 25.6                                   | 11.0                                     |
| CTL6      | 25,560,552,300  | 15,739,588,406                  | 61.6                                       | 37.3                       | 19.7                                  | 26.5                                   | 16.5                                     |
| CTL8      | 24,262,752,600  | 15,323,900,550                  | 63.2                                       | 33.1                       | 22.7                                  | 27.9                                   | 16.3                                     |
| CTL16     | 22,605,558,600  | 14,017,986,644                  | 62.0                                       | 28.7                       | 30.1                                  | 26.9                                   | 14.3                                     |
| CTL22     | 16,823,823,300  | 11,171,823,684                  | 66.4                                       | 30.2                       | 32.4                                  | 25.0                                   | 12.4                                     |
| CTL23     | 18,963,078,300  | 13,009,938,471                  | 68.6                                       | 30.1                       | 43.4                                  | 16.3                                   | 10.2                                     |
| CTL24     | 18,073,171,500  | 12,555,674,242                  | 69.5                                       | 30.4                       | 38.4                                  | 17.8                                   | 13.5                                     |
| CTL25     | 19,274,686,800  | 13,257,578,863                  | 68.8                                       | 35.5                       | 34.3                                  | 17.8                                   | 12.4                                     |
| CTL27     | 18,371,600,100  | 12,471,242,885                  | 67.9                                       | 32.5                       | 33.7                                  | 21.3                                   | 12.5                                     |

Supplementary Figure 1: Sample metrics collected using Picard's CollectRNASeqMetrics command. PF = Passed Filter
