# Supplementary material for: RNAseq Analyses Identify Tumor Necrosis Factor-Mediated Inflammation as a Major Abnormality in ALS Spinal Cord
Source: PubMed Central journal article supplement (PMC4972368; doi:10.1371/journal.pone.0160520), 2016-08-03
Supplement: pone.0160520.s002.pdf [file pone.0160520.s002.pdf]

## Supplementary Figure 2

| <b>Sample ID</b> | <b>Paired End Reads uniquely aligned to hg19 genes</b> | <b>Paired End Reads Multiply aligned to hg19 genes</b> |
|------------------|--------------------------------------------------------|--------------------------------------------------------|
| ALS1             | 17,079,872                                             | 13,923,290                                             |
| ALS2             | 12,142,430                                             | 14,946,592                                             |
| ALS3             | 22,456,944                                             | 20,252,817                                             |
| ALS4             | 20,074,506                                             | 29,925,873                                             |
| ALS9             | 25,147,130                                             | 18,710,778                                             |
| ALS10            | 16,567,040                                             | 22,428,047                                             |
| ALS14            | 22,785,166                                             | 15,660,804                                             |
| CTL6             | 24,978,566                                             | 32,026,378                                             |
| CTL8             | 21,336,355                                             | 31,498,430                                             |
| CTL16            | 17,091,970                                             | 21,962,757                                             |
| CTL22            | 14,265,193                                             | 21,672,506                                             |
| CTL23            | 16,029,151                                             | 16,133,502                                             |
| CTL24            | 15,524,378                                             | 25,106,385                                             |
| CTL25            | 18,959,037                                             | 21,189,291                                             |
| CTL27            | 16,821,773                                             | 20,867,799                                             |

Supplementary Figure 2 details the number of paired end reads that aligned either uniquely or multiply to hg19 genes. Uniquely aligned reads were used for DeSeq2 and EdgeR analyses.
