# Supplementary material for: RNAseq Analyses Identify Tumor Necrosis Factor-Mediated Inflammation as a Major Abnormality in ALS Spinal Cord
Source: PubMed Central journal article supplement (PMC4972368; doi:10.1371/journal.pone.0160520), 2016-08-03
Supplement: pone.0160520.s003.pdf [file pone.0160520.s003.pdf]

### Supplementary Figure 3

#### Downregulated DEGs

| <b>Top Canonical Pathways</b>            | <b>p-Value</b>    |
|------------------------------------------|-------------------|
| Superpathway of Cholesterol Biosynthesis | 1.83E-06          |
| Cholesterol Biosynthesis I               | 5.64E-05          |
| Cholesterol Biosynthesis II              | 5.64E-05          |
| Cholesterol Biosynthesis III             | 5.64E-05          |
| Hepatic Fibrosis                         | 5.16E-04          |
|                                          |                   |
| <b>Top Diseases and Disorders</b>        | <b>p-Value</b>    |
| Inflammatory Disease                     | 2.63E-03-3.17E-08 |
| Inflammatory Response                    | 1.91E-03-3.17E-08 |
| Organismal Injury and Abnormalities      | 2.63E-03-3.17E-08 |
| Renal and Urological Disease             | 2.63E-03-3.17E-08 |
| Dermatological Diseases and Conditions   | 1.75E-03-1.07E-07 |
|                                          |                   |
| <b>“Activated” Upstream Regulators</b>   | <b>p-Value</b>    |
| Arsenic trioxide                         | 4.36E-08          |
| Beta-estradiol                           | 1.23E-07          |
| DICER1                                   | 1.80E-07          |
| cholesterol                              | 2.94E-07          |
| Lysophosphatidic acid                    | 3.02E-07          |

Supplementary Figure 3 shows IPA Core Analysis Results for DEGs (18) identified as downregulated in the ALS group by all three analyses.
