# Supplementary material for: RNAseq Analyses Identify Tumor Necrosis Factor-Mediated Inflammation as a Major Abnormality in ALS Spinal Cord
Source: PubMed Central journal article supplement (PMC4972368; doi:10.1371/journal.pone.0160520), 2016-08-03
Supplement: pone.0160520.s004.pdf [file pone.0160520.s004.pdf]

### Supplementary Figure 4

| Gene     | Fold Change |
|----------|-------------|
| ABCG1    | 2.18        |
| APOC1    | 4.61        |
| APOE     | 3.25        |
| ASAH1    | 1.85        |
| BMF      | 2.73        |
| CAPG     | 3.00        |
| CD37     | 2.66        |
| CD84     | 1.99        |
| CD86     | 2.01        |
| CEBPA    | 3.29        |
| CECR1    | 1.73        |
| CPM      | 2.32        |
| CPVL     | 3.40        |
| CTSD     | 2.35        |
| CTSS     | 2.36        |
| CXCL16   | 2.40        |
| DNASE2   | 1.90        |
| FCGR2B   | 2.98        |
| GNB4     | 1.61        |
| GPNMB    | 5.39        |
| GPRIN3   | 1.84        |
| HAVCR2   | 2.08        |
| HLA-DMB  | 2.76        |
| HLA-DOA  | 2.32        |
| HLA-DRB1 | 4.10        |
| HPSE     | 2.96        |
| IL18     | 1.98        |
| ITGAX    | 2.68        |
| KCNJ5    | 2.43        |
| LILRA2   | 3.59        |
| LILRB4   | 2.98        |
| LTA4H    | 1.65        |
| OTUD1    | 1.79        |
| PIK3IP1  | 1.94        |
| PLA2G7   | 5.59        |
| SELPLG   | 2.82        |
| SIGLEC8  | 4.40        |
| SLC37A2  | 3.28        |
| SLC7A7   | 3.01        |
| TBXAS1   | 2.12        |
| TNFAIP2  | 2.29        |
| WDR91    | 1.72        |

Supplementary Figure 4 lists DEGs identified as “upregulated” in the ALS group that were also found in the black module. Fold change values from Cuffdiff2 are listed.
