# Supplementary material for: RNAseq Analyses Identify Tumor Necrosis Factor-Mediated Inflammation as a Major Abnormality in ALS Spinal Cord
Source: PubMed Central journal article supplement (PMC4972368; doi:10.1371/journal.pone.0160520), 2016-08-03
Supplement: pone.0160520.s005.pdf [file pone.0160520.s005.pdf]

## Supplementary Figure 5

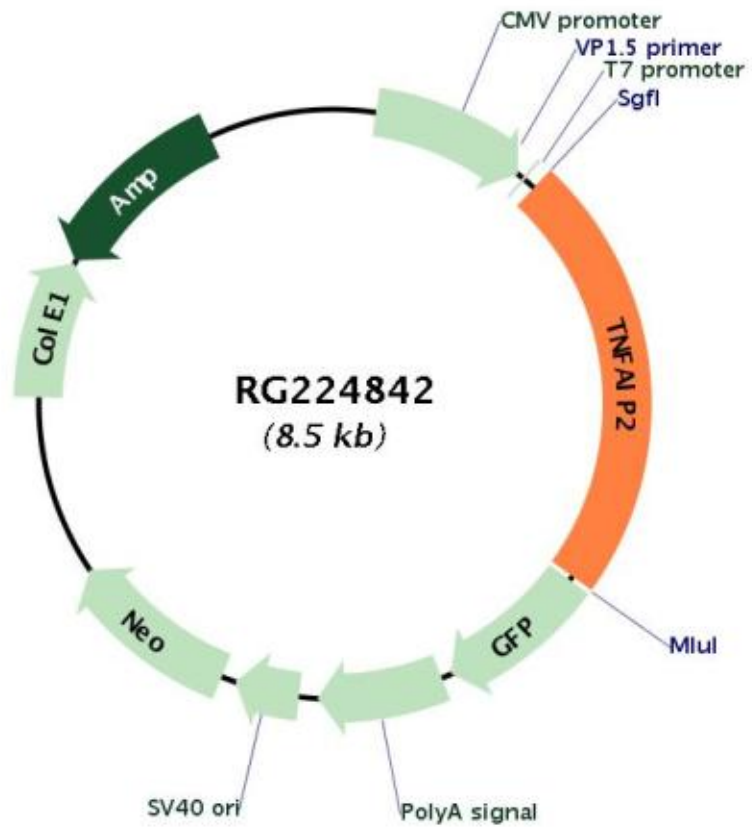

Supplementary Figure 5 shows the TNFAIP2-GFP plasmid used in this experiment. The empty vector used for the EV group was the same plasmid with TNFAIP2 CDS taken out.
