# Supplementary material for: RNAseq Analyses Identify Tumor Necrosis Factor-Mediated Inflammation as a Major Abnormality in ALS Spinal Cord
Source: PubMed Central journal article supplement (PMC4972368; doi:10.1371/journal.pone.0160520), 2016-08-03
Supplement: pone.0160520.s006.pdf [file pone.0160520.s006.pdf]

## Supplementary Figure 6

### Sienna 4 Module Genes

| <b>Top Canonical Pathways</b>                   | <b>p-Value</b>    |
|-------------------------------------------------|-------------------|
|                                                 |                   |
| Methylglyoxal Degradation VI                    | 2.78E-03          |
| Phosphatidylethanolamine Biosynthesis III       | 2.78E-03          |
| NGF Signaling                                   | 3.29E-03          |
| Branched-chain -keto acid Dehydrogenase Complex | 1.11E-02          |
| Phenylethylamine Degradation I                  | 1.11E-02          |
|                                                 |                   |
| <b>Top Diseases and Disorders</b>               | <b>p-Value</b>    |
|                                                 |                   |
| Developmental Disorder                          | 3.28E-02-7.55E-05 |
| Hereditary Disorder                             | 3.28E-02-7.55E-05 |
| Metabolic Disease                               | 2.44E-02-7.55E-05 |
| Organismal Injury and Abnormalities             | 4.14E-02-7.55E-05 |
| Renal and Urological Disease                    | 5.55E-03-7.55E-05 |
|                                                 |                   |
| <b>“Activated” Upstream Regulators</b>          | <b>p-Value</b>    |
| STAT6                                           | 5.19E-04          |
| STAT3/5                                         | 5.10E-03          |
| Butylbenzyl phthalate                           | 5.10E-03          |
| Folic acid                                      | 6.16E-03          |
| WHSC1L1                                         | 7.64E-03          |

Supplementary Figure 6 shows IPA Core Analysis Results for genes (67) comprising the sienna4 module.
