# Supplementary material for: RNAseq Analyses Identify Tumor Necrosis Factor-Mediated Inflammation as a Major Abnormality in ALS Spinal Cord
Source: PubMed Central journal article supplement (PMC4972368; doi:10.1371/journal.pone.0160520), 2016-08-03
Supplement: pone.0160520.s007.pdf [file pone.0160520.s007.pdf]

### Supplementary Figure 7

|                 | <b>Age</b> | <b>Ethnicity</b> | <b>Gender</b> |
|-----------------|------------|------------------|---------------|
| <b>Patients</b> |            |                  |               |
| <b>ALS1</b>     | 70         | Caucasian        | Male          |
| <b>ALS2</b>     | 67         | Caucasian        | Male          |
| <b>ALS3</b>     | 80         | Caucasian        | Female        |
| <b>ALS4</b>     | 57         | Caucasian        | Male          |
| <b>ALS9</b>     | 75         | Caucasian        | Female        |
| <b>ALS10</b>    | 64         | Caucasian        | Female        |
| <b>ALS14</b>    | 61         | Caucasian        | Male          |
|                 |            |                  |               |
| <b>Controls</b> |            |                  |               |
| <b>CTL6</b>     | 80         | African-American | Male          |
| <b>CTL8</b>     | 67         | Caucasian        | Female        |
| <b>CTL16</b>    | 66         | Caucasian        | Female        |
| <b>CTL22</b>    | 54         | Caucasian        | Male          |
| <b>CTL23</b>    | 65         | African-American | Female        |
| <b>CTL24</b>    | 83         | Caucasian        | Male          |
| <b>CTL25</b>    | 59         | Caucasian        | Male          |
| <b>CTL27</b>    | 84         | Caucasian        | Female        |

Supplementary Figure 7 shows all sample's age, ethnicity, and gender information.
