# Supplementary material for: RNAseq Analyses Identify Tumor Necrosis Factor-Mediated Inflammation as a Major Abnormality in ALS Spinal Cord
Source: PubMed Central journal article supplement (PMC4972368; doi:10.1371/journal.pone.0160520), 2016-08-03
Supplement: pone.0160520.s008.pdf [file pone.0160520.s008.pdf]

## Supplementary Figure 8

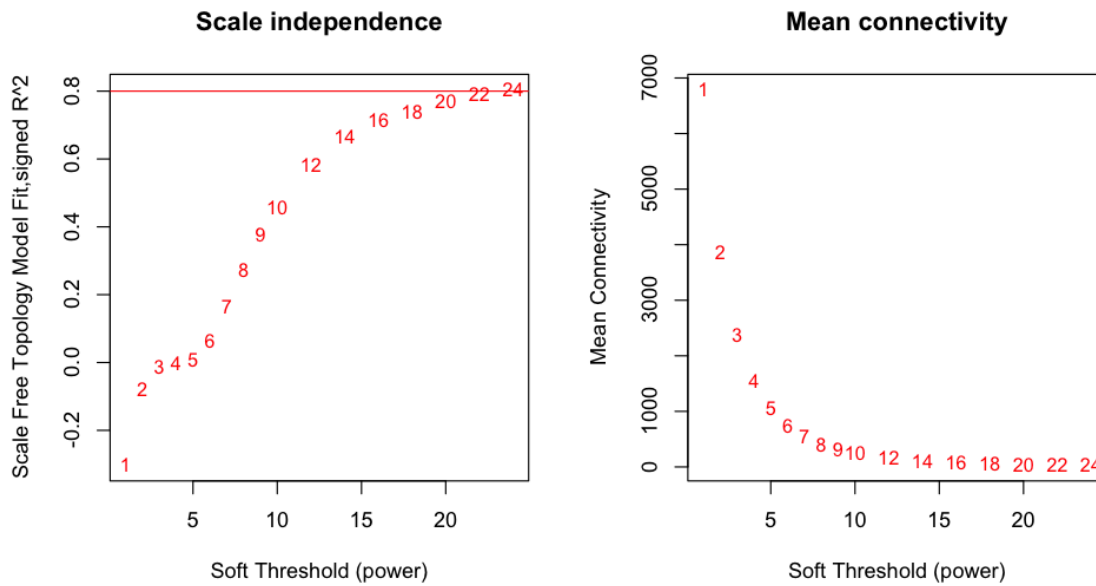

Supplementary Figure 8 shows raising the adjacency matrix to the power of 24 approximates scale free topology at .80.
